# Supplementary material
Source: HighWire-hosted journal article supplement (https://dmd.aspetjournals.org/highwire/filestream/75040/field_highwire_adjunct_files/0/DMD90829_Supplemental_Tables.pdf)
Supplement: DMD90829_Supplemental_Tables.pdf [file DMD90829_Supplemental_Tables.pdf]

Sarah Dubaisi, Hailin Fang, Joseph A. Caruso, Roger Gaedigk, Carrie A. Vyhldal, Thomas A. Kocarek, and Melissa Runge-Morris. Developmental Expression of *SULT1C4* Transcript Variants in Human Liver: Implications for Discordance Between *SULT1C4* mRNA and Protein Levels. *Drug Metabolism and Disposition*

**Supplemental Table 1. Primers used in the 5'-RACE and RT-qPCR analysis**

| Primer Name                                | Sequence                                                                                       |
|--------------------------------------------|------------------------------------------------------------------------------------------------|
| RACE Reverse                               | 5'- <b>GAT TAC GCC AAG CTT</b> <sup>1</sup> AGC AGG TCA TCA GGC TTG GCT TGG A-3'               |
| <i>SULT1C4</i> -forward <sup>2</sup>       | 5'- <b>CTC GCT AGC CTC GAG</b> <sup>1</sup> TAG AGG GCT GGA TAG TGT GGT AGT G-3'               |
| <i>SULT1C4</i> reverse <sup>2</sup>        | 5'- <b>CTT GAT ATC CTC GAG</b> <sup>1</sup> ATT GAG CTT CCC TCT CTC CAT GTC-3'                 |
| <i>SULT1C4</i> -TVs forward <sup>3</sup>   | 5'-CCT ATC CTA AAG CAG GAA CAA CA-3'                                                           |
| <i>SULT1C4</i> -TV1 reverse <sup>3</sup>   | 5'-ATG AGC TTG TTC CAA ACC AG-3'                                                               |
| <i>SULT1C4</i> -TV2 reverse <sup>3</sup>   | 5'-CAG GAG CCC CAG CAC ACA G-3'                                                                |
| <i>SULT1C4</i> -E3DEL reverse <sup>3</sup> | 5'-GGA TTT CTT GCT ACA TAG ATT ATC AG-3'                                                       |
| <i>SULT1C4</i> -HindIII-DDK-F <sup>4</sup> | 5'-GCG AAG CTT GCC ACC ATG <u>GAT TAC AAG GAT GAC GAC GAT AAG</u> ATG GCC TTA CAC GAC ATG G-3' |
| <i>SULT1C4</i> -XhoI-R <sup>4</sup>        | 5'-GCG CTC GAG TCA GAA CTG GAA GTG GAA AGT TAG TCT G-3'                                        |

<sup>1</sup> Sequences in bold overlap with the plasmid sequence; used for In-Fusion cloning of the DNA fragments

<sup>2</sup> Primers used to amplify *SULT1C4* TVs by standard RT-PCR; predicted to amplify an approximately 1.2 Kb fragment from the *SULT1C4* TV1 sequence

<sup>3</sup> Primers used for RT-qPCR to measure the individual *SULT1C4* TVs in human liver specimens

<sup>4</sup> Primers used to prepare the DDK-tagged expression plasmids containing the *SULT1C4* TVs. The underscored sequence of the forward primer encodes the DDK tag.

Sarah Dubaisi, Hailin Fang, Joseph A. Caruso, Roger Gaedigk, Carrie A. Vyhldal, Thomas A. Kocarek, and Melissa Runge-Morris. Developmental Expression of SULT1C4 Transcript Variants in Human Liver: Implications for Discordance Between SULT1C4 mRNA and Protein Levels. *Drug Metabolism and Disposition*

**Supplemental Table 2. 5'-Positions of 5'-RACE clones relative to SULT1C4 gene**

| Sequence                                              | Position of 5'-end on NC_000003.12 (GRCh38.p13) | Position of 5'-end relative to ATG <sup>2</sup> | Inr? <sup>1</sup> |
|-------------------------------------------------------|-------------------------------------------------|-------------------------------------------------|-------------------|
| <b>Published Sequences</b>                            |                                                 |                                                 |                   |
| SULT1C4 Gene, NM_006588 (TV1), and NM_001321770 (TV2) | 108,377,954                                     | -384                                            |                   |
| <b>Caco-2 5'-RACE Clones</b>                          |                                                 |                                                 |                   |
| 1                                                     | 108,377,958                                     | -380                                            |                   |
| 2                                                     | 108,378,021                                     | -317                                            | Y                 |
| 3                                                     | 108,377,954                                     | -384                                            |                   |
| 4                                                     | 108,377,985                                     | -353                                            | Y                 |
| 5                                                     | 108,377,957                                     | -381                                            | Y                 |
| 6                                                     | 108,377,954                                     | -384                                            |                   |
| 7                                                     | 108,377,938                                     | -400                                            | Y                 |
| 8                                                     | 108,377,954                                     | -384                                            |                   |
| 9                                                     | 108,378,000                                     | -338                                            |                   |
| 10                                                    | 108,377,954                                     | -384                                            |                   |
| <b>HepaRG 5'-RACE Clones</b>                          |                                                 |                                                 |                   |
| 11                                                    | 108,377,985                                     | -353                                            | Y                 |
| 12                                                    | 108,377,648                                     | -690                                            |                   |
| 13                                                    | 108,377,970                                     | -368                                            | Y                 |
| 14                                                    | 108,377,985                                     | -353                                            | Y                 |
| 15                                                    | 108,377,970                                     | -368                                            | Y                 |
| 16                                                    | 108,377,966                                     | -372                                            |                   |
| 17                                                    | 108,377,970                                     | -368                                            | Y                 |
| 18                                                    | 108,377,985                                     | -353                                            | Y                 |
| 19                                                    | 108,377,878                                     | -460                                            |                   |
| 20                                                    | 108,377,983                                     | -355                                            |                   |
| 21                                                    | 108,377,993                                     | -345                                            |                   |
| 22                                                    | 108,377,793                                     | -545                                            |                   |
| 23                                                    | 108,377,985                                     | -353                                            | Y                 |

<sup>1</sup>Inr?: The 5'-ends of clones marked with "Y" are located within predicted consensus initiator elements. The consensus sequence of the human Inr is BBCA<sub>+1</sub>BW, according to a recent report (Vo ngoc et al, 2017). B=C or G or T; W=A or T

<sup>2</sup>ATG, Translation start site

Sarah Dubaisi, Hailin Fang, Joseph A. Caruso, Roger Gaedigk, Carrie A. Vyhldal, Thomas A. Kocarek, and Melissa Runge-Morris. Developmental Expression of SULT1C4 Transcript Variants in Human Liver: Implications for Discordance Between SULT1C4 mRNA and Protein Levels. *Drug Metabolism and Disposition*

**Supplemental Table 3. Median amounts of the three SULT1C4 TVs measured by RT-qPCR**

|          | SULT1C4 TV1 | TV2  | E3DEL |
|----------|-------------|------|-------|
| Prenatal | 7.64        | 43.6 | 2.72  |
| Infant   | 0.379       | 8.46 | 0.177 |
| Adult    | 0.162       | 4.07 | 0.109 |

**Supplemental Table 4. Average of raw transcript per million (TPM) values of the three SULT1C4 TVs that were detected with RNA-seq**

|                 | SULT1C4 TV1<br>ENST00000272452 | SULT1C4 TV2<br>ENST00000409309 | Non-coding SULT1C4<br>ENST00000494122 |
|-----------------|--------------------------------|--------------------------------|---------------------------------------|
| Prenatal        | 1.05                           | 2.29                           | 1.21                                  |
| Infant          | 0.311                          | 0.406                          | 0.230                                 |
| 1-2 years old   | 0.0833                         | 0.0967                         | 0.0733                                |
| 2-5 years old   | 0.0727                         | 0.179                          | 0.0964                                |
| 6-11 years old  | 0.0592                         | 0.130                          | 0.0985                                |
| 12-18 years old | 0.0927                         | 0.143                          | 0.0536                                |

**Supplemental Table 5. Measurement of SULT1C4 TV1- or TV2-derived protein levels by quantitative proteomics in transfected HEK293 cells**

| Sample | Amount of SULT1C4 Protein<br>(fmol/mg) |
|--------|----------------------------------------|
| EV     | <LD                                    |
| TV1    | 5.31 ± 0.27 <sup>1</sup>               |
| TV2    | <LD                                    |

<sup>1</sup>Mean ± SD

EV, Empty vector transfected; <LD, below limit of detection
